# Supplementary material for: Spatial confinement – rapid 2D F−diffusion in micro- and nanocrystalline RbSn2F5
Source: Royal Society of Chemistry journal article supplement (doi:10.1039/c8cp07206j), 2019-01-01
Supplement: c8cp07206j1.pdf [file c8cp07206j1.pdf]

Supplementary Information

## Spatial confinement — Rapid 2D F<sup>-</sup> diffusion in micro- and nanocrystalline RbSn<sub>2</sub>F<sub>5</sub>

Maria Gombotz,<sup>\*a</sup> Sarah Lunghammer,<sup>a</sup> Stefan Breuer,<sup>a</sup> Ilie Hanzu,<sup>a,b</sup> Florian Preishuber-Pflügl,<sup>a‡</sup> and H. Martin R. Wilkening<sup>\*a,b</sup>

<sup>a</sup> Christian Doppler Laboratory for Lithium Batteries, and Institute for Chemistry and Technology of Materials, Graz University of Technology (NAWI Graz), Stremayrgasse 9, 8010 Graz, Austria. Fax: +43 316 873 32332; Tel: +43 316 873 32330.

E-Mail: [wilkening@tugraz.at](mailto:wilkening@tugraz.at) ; E-mail: [gombotz@tugraz.at](mailto:gombotz@tugraz.at)

<sup>b</sup> Alistore-ERI European Research Institute, 33 rue Saint Leu, 80039 Amiens, France.

‡ Present address: Schunk Carbon Technology GmbH, Au 62, 4822 Bad Goisern, Austria

In Fig. S1 scanning electron microscopy images of RbSn<sub>2</sub>F<sub>5</sub> are shown which were recorded after different annealing steps of the fluoride in Ar atmosphere. At elevated annealing temperatures we clearly see that the sample decompose. Metallic spots (needles) seen in light microscopy indicate Sn<sup>0</sup>. SEM reveals that microcrystalline RbSn<sub>2</sub>F<sub>5</sub> is composed of small particles and rectangular tubes (or needles). Some of the tubes reach lengths in the order of 20 μm.

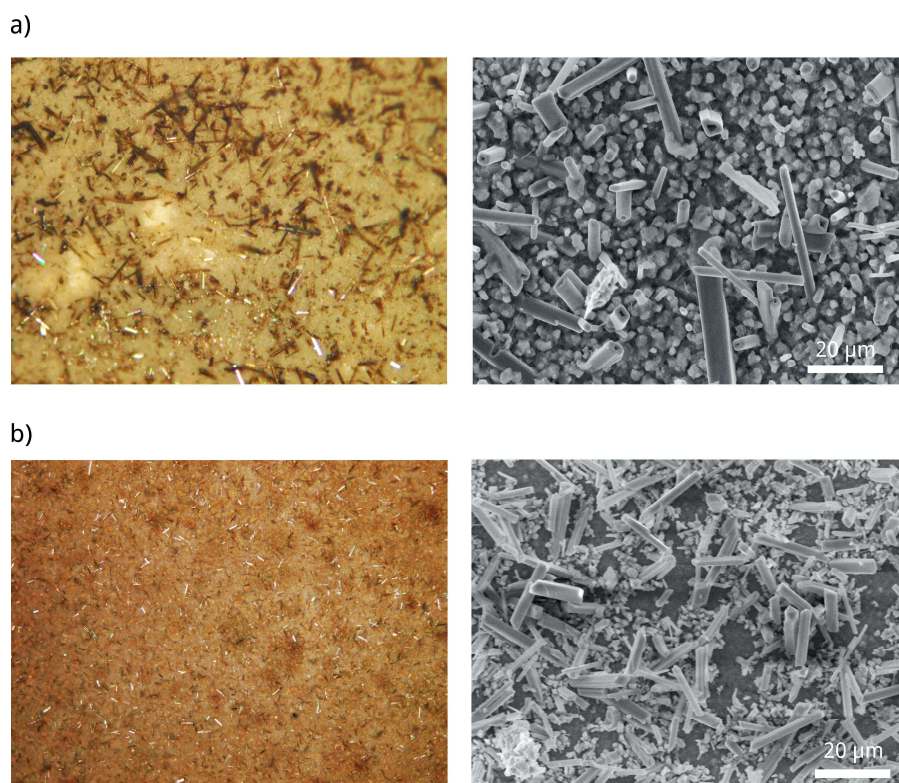

**Fig. S1** a) RbSn<sub>2</sub>F<sub>5</sub> annealed at 265 °C. left: image obtained via light microscopy (Olympus BX60) under 20 fold magnification; right: SEM picture (VEGA3 TESCAN electron microscope, 20 kV) under 2500 fold magnification. b) RbSn<sub>2</sub>F<sub>5</sub> annealed at 225 °C. left: image obtained via light microscopy under 20 fold magnification; right: SEM picture under 2000 fold magnification. Annealing at 200 °C does not reveal any spots of metallic Sn.

In Fig. S2 the electrical permittivity spectra of microcrystalline  $\text{RbSn}_2\text{F}_5$  are shown. They also reveal a two-step behaviour that mirrors electrical responses due to bulk and g.b. regions.

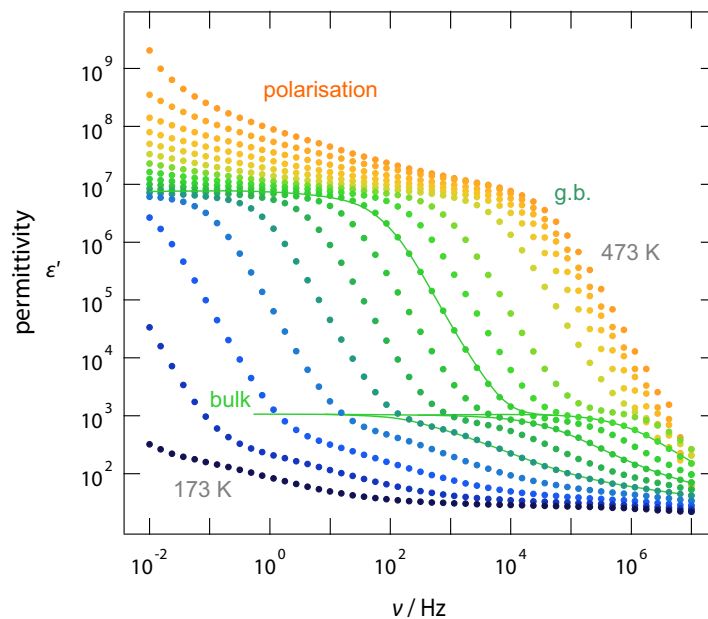

**Fig. S2** Permittivity spectra of  $\text{RbSn}_2\text{F}_5$  annealed at 473 K. The solid lines are to guide the eye; they help identify the bulk and g.b. responses (as indicated). Temperatures varied from 173 K to 473 K (in steps of 20 K).
